# Supplementary material for: Implications of monoclonal gammopathy and isoelectric focusing pattern 5 on the free light chain kappa diagnostics in cerebrospinal fluid
Source: publisher site journal article supplement (doi:10.1515/cclm-2023-1468), 2024-07-22
Supplement: Supplementary file 1 [file j_cclm-2023-1468_suppl_001.docx]

**Supplemental material:**

**Figure 1**

Figure 1: Flow chart for the distribution of the individual results. Of the 269 patient samples, 106 were amenable to FLCK determination. Of these, 8 were omitted due to excessive blood spiking. 18 showed pattern 5+2 OCB while 80 patient samples presented solely pattern 5 OCB. Further discrimination is based on the FLCK IF.

OCB: oligoclonal bands; FLCκ: free light chains kappa; IF: intrathecal fraction

**Figure 2**


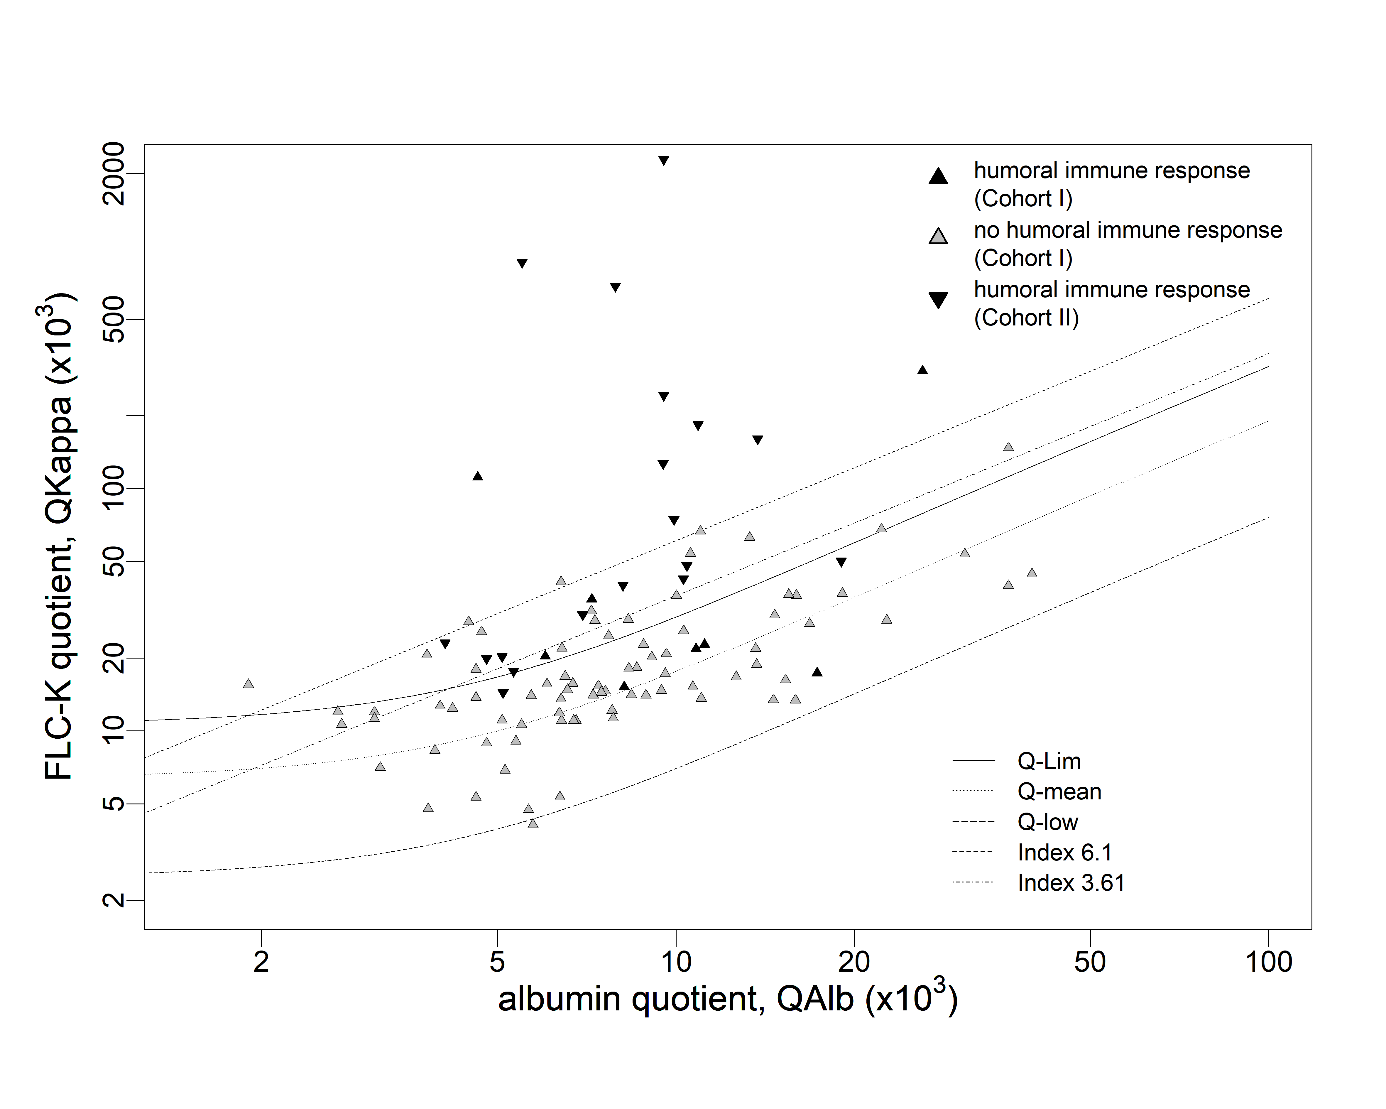


Figure 2: Data of the analysed CSF and serum samples in a double logarithmic FLCκ quotient diagram. For the illustration, the samples were divided into 2 cohorts: Cohort I includes samples with pattern 5 in isoelectric focusing with or without additional IgG, IgA or IgM synthesis in the corresponding quotient diagrams. Cohort 2 includes samples with pattern 5 and pattern 2 at the same time. Additionally the FLCk-Index 3.61 and Index 6.1 are shown. Using the FLCk-Index 6.1, one would recognize 15 samples as false negative, with a FLCk-Index of 3.61 only 6 samples. The optimal interpretation method for a disease-independent evaluation of an intrathecal humoral immune response therefore remains the reference range of the quotient diagram according to Hansotto Reiber (1).

Figure 3: Flow chart for the distribution of the individual results. Of the 269 patient samples, 106 were amenable to FLCK determination. Of these, 8 were omitted due to excessive blood spiking. 18 showed pattern 5+2 OCB while 80 patient samples presented solely pattern 5 OCB. Further discrimination was based on the FLCK Index (3.61) published earlier (2)

OCB: oligoclonal bands; FLCκ: free light chains kappa; IF: intrathecal fraction

**Figure 4**

Figure 4: Flow chart for the distribution of the individual results. Of the 269 patient samples, 106 were amenable to FLCK determination. Of these, 8 were omitted due to excessive blood spiking. 18 showed pattern 5+2 OCB while 80 patient samples presented solely pattern 5 OCB. Further discrimination was based on the FLCK Index (6.1) as published in (3).

OCB: oligoclonal bands; FLCκ: free light chains kappa; IF: intrathecal fraction

**Table 1**

|  | Pattern 5 in isoelectric focusing (n=57) | Combined pattern 5 and 2 in isoelectric focusing (n=14) |
| --- | --- | --- |
| Age (y) | 69 (61; 77) | 69 (58; 78) |
| Female n (%) | 16 (28) | 4 (29) |
| Known hematological malignancy n (%) | MM/lymphoma 7 (12) | MM/lymphoma 3 (21) |
| Immunfixation serum n (%) available samples   - IgG kappa - IgG lambda - IgA kappa - IgA lambda | 57 (100)  29 (51)  26(45)  1 (2)  1 (2) | 14 (100)  6 (43)  8 (57) |
| FLCκ serum (mg/l) | 17.2 (12.3;25.2) | 12.65 (10.1; 14.5) |
| FLCκ CSF (mg/l) | 0.29 (0.17;0.48) | 0.74 (0.29; 1.17) |
| QFLCκ | 15.2 (11.1; 27.7) | 41.2 (20.9; 113:9) |
| FLCκ Index (QFLCκ/QAlb) | 2.1 (1.6; 3.4) | 4.7 (4.1; 10.6) |
| FLCκ IF>0%n (%) | 10 (18) | 13 (93) |
| FLCκ Index > 6.6 | 2 (4) | 5 (35) |
| FLCκ Index > 3.61 | 8 (14) | 12 (85) |
| CC (/µl) | 1 (1; 3) | 1 (2;4) |
| Lactate (mmol/l) | 1.9 (1.7; 2.2) | 2.1 (1.8; 2.3) |
| QAlb | 7.8 (5.74; 13.31) | 8.8 (5.16; 9.83) |
| QIgG | 3.67 (2.67;6.88) | 4.19 (2.96; 5.98) |
| QIgM | 0.77 (0.48;1.66) | 0.94 (0.71; 2.16) |
| QIgA | 2.1 (1.37; 3.72) | 1.88 (1.81; 2.23) |

Data Hannover: Continuous data are expressed as median (first; third quartiles); nominal data are given as percentages. CC = cell count (leukocytes), QIgG/A/M = Immunoglobulin G/A/M quotient, QFLCκ = free light chain kappa quotient, QlimIgG/IgA/IgM/FLCκ = upper limit of the hyperbolic reference range, IF IgG/IgA/IgM/FLCκ = intrathecal fraction, MM multiple myeloma

**Table 2**

|  | Pattern 5 in isoelectric focusing (n=23) | Combined pattern 5 and 2 in isoelectric focusing (n=4) |
| --- | --- | --- |
| Age (y) | 73 (66; 77) | 54 (50; 65) |
| Female n (%) | 16 (28) | 3 (75) |
| Known hematological malignancy n (%) | MM/lymphoma 7 (12) | MM/lymphoma 3 (21) |
| Immunfixation serum n (%) available samples   - IgG kappa - IgG lambda - IgA kappa - IgA lambda | 19 (83)  11 (58)  8 (42) | 3 (75)  2  1 |
| FLCκ serum (mg/l) | 12.2 (8.1; 32.1) | 19.2 (11.5; 35.6) |
| FLCκ CSF (mg/l) | 0.28 (0.14; 0.83) | 5.66 (4.42; 7.48) |
| QFLCκ | 17.9 (13.7; 29.8) | 434 (150; 728) |
| FLCκ Index (QFLCκ/QAlb) | 3.2 (2.2; 4.2) | 51.7 (13.3; 104) |
| FLCκ IF>0%n (%) | 10 (18) | 3 (75) |
| FLCκ Index > 6.6 | 1 (4) | 3 (75) |
| FLCκ Index > 3.61 | 11 (47) | 3 (75) |
| CC (/µl) | 1 (1; 4) | 1 (2; 30) |
| Lactate (mmol/l) | 2.3 (1.9; 2.6) | 2.3 (2.1; 2.5) |
| QAlb | 7.2 (4.4; 9.6) | 9.4 (7.3; 12.9) |
| QIgG | 3.2 (2.25;4.4) | 9.75 (4.75; 9.34) |
| QIgM | 0.5 (0.3; 0.5) | 1 (0.55; 1.63) |
| QIgA | 1.85 (1.8; 2.93) | 3.35 (2.5; 4.88) |

Data Greifswald: Continuous data are expressed as median (first; third quartiles); nominal data are given as percentages. CC = cell count (leukocytes), QIgG/A/M = Immunoglobulin G/A/M quotient, QFLCκ = free light chain kappa quotient, QlimIgG/IgA/IgM/FLCκ = upper limit of the hyperbolic reference range, IF IgG/IgA/IgM/FLCκ = intrathecal fraction, MM multiple myeloma

1. Reiber H, Zeman D, Kusnierova P, Mundwiler E, Bernasconi L. Diagnostic relevance of free light chains in cerebrospinal fluid - The hyperbolic reference range for reliable data interpretation in quotient diagrams. Clin Chim Acta. 2019;497:153-62.

2. Süße M, Hannich M, Petersmann A, Zylla S, Pietzner M, Nauck M, et al. Kappa free light chains in cerebrospinal fluid to identify patients with oligoclonal bands. Eur J Neurol. 2018;25(9):1134-9.

3. Hegen H, Walde J, Berek K, Arrambide G, Gnanapavan S, Kaplan B, et al. Cerebrospinal fluid kappa free light chains for the diagnosis of multiple sclerosis: A systematic review and meta-analysis. Mult Scler. 2023;29(2):169-81.
